# Supplementary material for: Evaluation Methods for Assessing Users’ Psychological Experiences of Web-Based Psychosocial Interventions: A Systematic Review
Source: PubMed Central journal article supplement (PMC4945819; doi:10.2196/jmir.5455), 2016-06-30
Supplement: jmir_v18i6e181_app1.pdf [file jmir_v18i6e181_app1.pdf]

## Appendix 1: Database search details

| Database                                         | Source        | Field     | Search terms                                                                                                                                                                                                                                                                                                                       | Hits | Screened |
|--------------------------------------------------|---------------|-----------|------------------------------------------------------------------------------------------------------------------------------------------------------------------------------------------------------------------------------------------------------------------------------------------------------------------------------------|------|----------|
| EBSCO Health Databases (excluding Sports/Dental) | Peer reviewed | All       | ( (online N5 intervention) OR (online N5 treatment) OR (online N5 therapy) OR (web* N5 intervention) OR (web* N5 treatment) OR (web* N5 therapy) OR (internet* N5 intervention) OR (Internet* N5 treatment) OR (internet* N5 therapy) ) AND ( "mental health" OR psych* OR behavio* ) AND (experience OR evaluation OR usability ) | 764  | 37       |
| EBSCO Computers & Applied Sciences Complete      | Peer reviewed | All       | ( (online N5 intervention) OR (online N5 treatment) OR (online N5 therapy) OR (web* N5 intervention) OR (web* N5 treatment) OR (web* N5 therapy) OR (internet* N5 intervention) OR (Internet* N5 treatment) OR (internet* N5 therapy) ) AND ( "mental health" OR psych* OR behavio* ) AND (experience OR evaluation OR usability ) | 122  | 13       |
| EBSCO Health Databases (Exc Sports/Dental)       | All           | All       | (internet AND usability AND ehealth)                                                                                                                                                                                                                                                                                               | 31   | 8        |
| EBSCO Health Databases (Exc Sports/Dental)       | All           | All       | ((“cognitive walk through” OR “think aloud”) AND ehealth)                                                                                                                                                                                                                                                                          | 5    | 1        |
| EBSCO Computers & Applied Sciences Complete      | All           | All       | (internet AND usability AND ehealth)                                                                                                                                                                                                                                                                                               | 26   | 0        |
| EBSCO Computers & Applied Sciences Complete      | All           | All       | ((“cognitive walk through” OR “think aloud”) AND ehealth)                                                                                                                                                                                                                                                                          | 3    | 0        |
| IEEE                                             | Open          | Meta-data | (experience AND evaluation AND ehealth AND intervention AND psycho*)                                                                                                                                                                                                                                                               | 89   | 0        |

|              |      |           |                                                                                                                                                                                                                                                                                                                                   |             |           |
|--------------|------|-----------|-----------------------------------------------------------------------------------------------------------------------------------------------------------------------------------------------------------------------------------------------------------------------------------------------------------------------------------|-------------|-----------|
| ABI Inform   | Open | Full text | ((online N5 intervention) OR (online N5 treatment) OR (online N5 therapy) OR (web* N5 intervention) OR (web* N5 treatment) OR (web* N5 therapy) OR (internet* N5 intervention) OR (Internet* N5 treatment) OR (internet* N5 therapy) ) AND ( "mental health" OR psych* OR behavio* ) AND (experience OR evaluation OR usability ) | 346         | 0         |
| <b>Total</b> |      |           |                                                                                                                                                                                                                                                                                                                                   | <b>1386</b> | <b>59</b> |

Table Note: Search limited to studies published from 2004-2015; Title and abstracts reviewed for duplication, inclusion and exclusion.
