# Supplementary material for: Evaluation Methods for Assessing Users’ Psychological Experiences of Web-Based Psychosocial Interventions: A Systematic Review
Source: PubMed Central journal article supplement (PMC4945819; doi:10.2196/jmir.5455), 2016-06-30
Supplement: jmir_v18i6e181_app2.pdf [file jmir_v18i6e181_app2.pdf]

## Appendix 2. Included studies

| Reference                                                | Intervention                                                                                                                                                                                                                           | Study Objective                                  | User Experience Focus |
|----------------------------------------------------------|----------------------------------------------------------------------------------------------------------------------------------------------------------------------------------------------------------------------------------------|--------------------------------------------------|-----------------------|
| Baños, et al. (2014) [33]                                | <ul style="list-style-type: none"> <li>• EARTH of Well-Being,</li> <li>• 3 self-guided activity modules done over 6 sessions</li> <li>• Promote positive mood and relaxation in users</li> </ul>                                       | Development and evaluation                       | No                    |
| Bendelin et al. (2011) [34]                              | <ul style="list-style-type: none"> <li>• Pilot CBT website (not specified)</li> <li>• Self-help, some guided therapy</li> <li>• Treatment of depression</li> </ul>                                                                     | Qualitative user experience                      | Yes                   |
| Bradley, Robinson, & Brannen (2012) [35]                 | <ul style="list-style-type: none"> <li>• "Feeling Better"</li> <li>• Self-help CBT modules</li> <li>• Adolescents with psychological distress</li> </ul>                                                                               | Acceptability of the programme for adolescents   | Yes                   |
| Cartreine, Locke, Buckley, Sandoval, & Hegel (2012) [36] | <ul style="list-style-type: none"> <li>• Internet multimedia problem solving therapy (not specified)</li> <li>• Simulation of 6 clinical sessions</li> <li>• Built for NASA as remote treatment of mild depression</li> </ul>          | Pilot study                                      | No                    |
| de Graaf, Huibers, Riper, Gerhards, & Arntz (2009) [37]  | <ul style="list-style-type: none"> <li>• "Colour Your Life"</li> <li>• Multimedia, interactive, modular self-help and online diary.</li> <li>• Treatment of sub-threshold depression</li> </ul>                                        | Use and acceptability                            | No                    |
| Devi, Carpenter, Powell & Singh (2014) [38]              | <ul style="list-style-type: none"> <li>• "Activate you Heart"</li> <li>• Six-week self-help, nurse feedback, chat groups, on-line diary</li> <li>• Cardiac rehabilitation; lifestyle and psychological well-being programme</li> </ul> | User experience                                  | Yes                   |
| Fergus et al. (2014) [39]                                | <ul style="list-style-type: none"> <li>• "Couplelinks"</li> <li>• Six modules, interactive with therapist, chat room</li> <li>• Breast Cancer support for couples</li> </ul>                                                           | Feasibility and acceptability                    | No                    |
| Gega, Smith & Reynolds (2013) [40]                       | <ul style="list-style-type: none"> <li>• "Beating the Blues"</li> <li>• Modular CBT with information, homework, monitoring</li> <li>• Treatment of depression</li> </ul>                                                               | Experience between CBT on-line and therapist CBT | Yes                   |

| Reference                                                         | Intervention                                                                                                                                                                                                                                                                                               | Study Objective                                                         | User Experience Focus |
|-------------------------------------------------------------------|------------------------------------------------------------------------------------------------------------------------------------------------------------------------------------------------------------------------------------------------------------------------------------------------------------|-------------------------------------------------------------------------|-----------------------|
| Gerhards et al. (2011) [41]                                       | <ul style="list-style-type: none"> <li>• "Colour Your Life"</li> <li>• Multimedia, interactive, modular self-help and online diary.</li> <li>• Treatment of sub-threshold depression</li> </ul>                                                                                                            | Patient experience                                                      | Yes                   |
| Gorlick, Bantum, & Owen (2014) [42]                               | <ul style="list-style-type: none"> <li>• health-space.net</li> <li>• 12-week interactive self help and support group</li> <li>• Provide social and psychological support to assist cancer patients</li> </ul>                                                                                              | Understand experience of those who do not engage fully with the program | Yes                   |
| Gulec et al. (2011) [43]                                          | <ul style="list-style-type: none"> <li>• Internet-based Aftercare for Patients with Eating Disorders "EDINA"</li> <li>• Self-help modules with psychoeducation, forums and individual chat sessions with online counsellors</li> <li>• Maintenance treatment for patients with eating disorders</li> </ul> | Program assessment                                                      | No                    |
| Hind et al. (2010) [44]                                           | <ul style="list-style-type: none"> <li>• "MoodGYM" and "Beating the Blues"</li> <li>• 8 –week (Beating the Blues) or 6-week (Mood Gym) Self-help CBT modular programme</li> <li>• Treatment of depression in people with chronic disease, (multiple sclerosis).</li> </ul>                                 | Acceptability of program for chronic disease patients                   | Yes                   |
| Lara et al. (2014) [45]                                           | <ul style="list-style-type: none"> <li>• HDep (Help for Depression)</li> <li>• Psychoeducation and seven self-help modules</li> <li>• Complementary treatment for depression</li> </ul>                                                                                                                    | Website development                                                     | No                    |
| Lederman, Wadley, Gleeson, Bendall, & Alvarez-Jimenez (2014) [46] | <ul style="list-style-type: none"> <li>• Moderated Online Social Therapy (MOST) (website not specified)</li> <li>• Modular CBT, psychoeducation and Positive Psychology, and moderated support groups (6 week trial)</li> <li>• Support for adults experiencing First Episode Psychosis</li> </ul>         | Intervention design and evaluation                                      | No                    |

| Reference                                               | Intervention                                                                                                                                                                                                                                                         | Study Objective                                                                  | User Experience Focus |
|---------------------------------------------------------|----------------------------------------------------------------------------------------------------------------------------------------------------------------------------------------------------------------------------------------------------------------------|----------------------------------------------------------------------------------|-----------------------|
| Lillevoll et al. (2013) [47]                            | <ul style="list-style-type: none"> <li>• "MoodGYM"</li> <li>• Self-help CBT modular programme</li> <li>• Treatment of depression</li> </ul>                                                                                                                          | Patient experience                                                               | Yes                   |
| McClay, Waters, McHale, Schmidt, & Williams (2013) [48] | <ul style="list-style-type: none"> <li>• "Overcoming Bulimia Online" (OBO)</li> <li>• Multimedia, interactive, self-help modules</li> <li>• Treatment of Bulimia Nervosa (BN) and eating disorders not otherwise specified (EDNOS) attitudes towards cCBT</li> </ul> | Investigate patient experiences                                                  | Yes                   |
| Serowik, Ablondi, Black, & Rosen (2014) [49]            | <ul style="list-style-type: none"> <li>• Website (not specified)</li> <li>• Multimedia interactive Motivational Interviewing framework in 3-sessions</li> <li>• Assist veterans with psychiatric conditions apply for benefits or work</li> </ul>                    | Website development                                                              | No                    |
| Tonkin-Crine et al (2013) [50]                          | <ul style="list-style-type: none"> <li>• "Regul8"</li> <li>• Self-management via CBT in 8 interactive modules</li> <li>• Irritable Bowel Syndrome management of psychological issues</li> </ul>                                                                      | User experience nested within an RCT study                                       | Yes                   |
| Topolovec-Vranic et al. (2010)[51]                      | <ul style="list-style-type: none"> <li>• MoodGYM</li> <li>• Internet-based, interactive CBT programme with 6 modules</li> <li>• Treatment for depression, prevent and decrease symptoms</li> </ul>                                                                   | Efficacy of program among persons with traumatic brain injury                    | No                    |
| Van Voorhees et al. (2007) [52]                         | <ul style="list-style-type: none"> <li>• Depression prevention programme (not specified)</li> <li>• 11 self-help modules</li> <li>• Prevent depression in young adults (&lt;25 years)</li> </ul>                                                                     | Development and evaluation                                                       | No                    |
| Wade et al. (2009)[53]                                  | <ul style="list-style-type: none"> <li>• I-InTERACT</li> <li>• Resources, 10 multimedia, self-guided sessions and 5 supplementary, live parent skills coaching - Parent Child Interaction Treatment (PCIT)</li> <li>• Reduce child behaviour problems</li> </ul>     | Efficacy of program for families with young children with Traumatic Brain Injury | No                    |

| <b>Reference</b> | <b>Intervention</b>                              | <b>Study Objective</b> | <b>User Experience Focus</b> |
|------------------|--------------------------------------------------|------------------------|------------------------------|
|                  | and parenting stress for young children with TBI |                        |                              |
