# Supplementary material for: Evaluation Methods for Assessing Users’ Psychological Experiences of Web-Based Psychosocial Interventions: A Systematic Review
Source: PubMed Central journal article supplement (PMC4945819; doi:10.2196/jmir.5455), 2016-06-30
Supplement: jmir_v18i6e181_app3.pdf [file jmir_v18i6e181_app3.pdf]

### Appendix 3. Excluded studies

| Reference                                                                                                                                                                                                                                                                                                    | Reason to exclude                                    |
|--------------------------------------------------------------------------------------------------------------------------------------------------------------------------------------------------------------------------------------------------------------------------------------------------------------|------------------------------------------------------|
| Adams, J., Neville, S., & Dickinson, P. (2013). Evaluation of Bro Online: an Internet-based HIV prevention initiative for gay and bisexual men. <i>International Journal of Health Promotion &amp; Education</i> , 51(5), 239-247. doi: 10.1080/14635240.2012.702502                                         | Intervention type and health issue                   |
| Ammann, R., Vandelanotte, C., De Vries, H., & Mummery, W. K. (2013). Can a Website-Delivered Computer-Tailored Physical Activity Intervention Be Acceptable, Usable, and Effective for Older People? <i>Health Education &amp; Behavior</i> , 40(2), 160-170. doi: 10.1177/1090198112461791                  | Not users' psychological experience and health issue |
| Atkinson, N. L., Saperstein, S. L., Desmond, S. M., Gold, R. S., Billing, A. S., & Tian, J. (2009). Rural eHealth nutrition education for limited-income families: an iterative and user-centered design approach. <i>Journal of Medical Internet Research</i> , 11(2), e21-e21. doi: 10.2196/jmir.1148      | Not users' psychological experience and health issue |
| Beattie, A., Shaw, A., Kaur, S., & Kessler, D. (2009). Primary-care patients' expectations and experiences of online cognitive behavioural therapy for depression: a qualitative study. <i>Health Expectations</i> , 12(1), 45-59. doi: 10.1111/j.1369-7625.2008.00531.x                                     | Intervention type                                    |
| Bowen, A. M., L., W. M., M., D. C., & S., C. (2008). Internet based HIV prevention research targeting rural MSM: feasibility, acceptability, and preliminary efficacy. <i>Journal of Behavioral Medicine</i> , 31(6), 463-477. doi: 10.1007/s10865-008-9171-6                                                | Not users' psychological experience and health issue |
| Carrard, I., Fernandez-Aranda, F., Lam, T., Nevenon, L., Liwowsky, I., Volkart, A. C., . . . Norring, C. (2011). Evaluation of a guided internet self-treatment programme for bulimia nervosa in several European countries. <i>European Eating Disorders Review</i> , 19(2), 138-149. doi: 10.1002/erv.1043 | Not users' psychological experience                  |
| Carswell, K., McCarthy, O., Murray, E., & Bailey, J. V. (2012). Integrating Psychological Theory Into the Design of an Online Intervention for Sexual Health: The Sexunzipped Website. <i>Journal of Medical Internet Research</i> , 14(6), 11-11. doi: 10.2196/resprot.2114                                 | Not users' psychological experience                  |
| Cunningham, J. A., & Van Mierlo, T. (2009). Methodological issues in the evaluation of Internet-based interventions for problem drinking. <i>Drug &amp; Alcohol Review</i> , 28(1), 12-17. doi: 10.1111/j.1465-3362.2008.00001.x                                                                             | Not users' psychological experience                  |
| Currie, S. L., McGrath, P. J., & Day, V. (2010). Development and usability of an online CBT program for symptoms of moderate depression, anxiety, and stress in post-secondary students. <i>Computers in Human Behavior</i> , 26(6), 1419-1426. doi: 10.1016/j.chb.2010.04.020                               | Not users' psychological Experience                  |
| Demment, M. M., Graham, M. L., & Olson, C. M. (2014). How an online intervention to prevent excessive gestational weight gain is used and by whom: a randomized controlled process evaluation. <i>Journal of Medical Internet Research</i> , 16(8), e194-e194. doi: 10.2196/jmir.3483                        | Not users' psychological Experience                  |

| Reference                                                                                                                                                                                                                                                                                                                                             | Reason to exclude                                    |
|-------------------------------------------------------------------------------------------------------------------------------------------------------------------------------------------------------------------------------------------------------------------------------------------------------------------------------------------------------|------------------------------------------------------|
| Duffy, S. A., Fowler, K. E., Flanagan, P. S., Ronis, D. L., Ewing, L. A., Waltje, A. H., & Eysenbach, G. (2013). The Development of the Tobacco Tactics Website. <i>Journal of Medical Internet Research</i> , 15(6), 1-1. doi: 10.2196/resprot.2445                                                                                                  | Not users' psychological experience and health issue |
| Durand, M.-A., Wegwarth, O., Boivin, J., & Elwyn, G. (2012). Design and usability of heuristic-based deliberation tools for women facing amniocentesis. <i>Health Expectations</i> , 15(1), 32-48. doi: 10.1111/j.1369-7625.2010.00651.x                                                                                                              | Health issue                                         |
| Graaf, M. d., Totte, J., Breugem, C., Os-Medendorp, H. v., Pasmans, S., & Eysenbach, G. (2013). Evaluation of the Compliance, Acceptance, and Usability of a Web-Based eHealth Intervention for Parents of Children With Infantile Hemangiomas: Usability Study. <i>Journal of Medical Internet Research</i> , 15(12), 1-1. doi: 10.2196/resprot.2897 | Health issue                                         |
| Hallett, J., Maycock, B., Kypri, K., Howat, P., & Mcmanus, A. (2009). Development of a Web-based alcohol intervention for university students: Processes and challenges. <i>Drug &amp; Alcohol Review</i> , 28(1), 31-39. doi: 10.1111/j.1465-3362.2008.00008.x                                                                                       | Not users' psychological experience                  |
| Hightow-Weidman, L. B., Fowler, B., Kibe, J., McCoy, R., Pike, E., Calabri, M., & Adimora, A. (2011). HealthMpowerment.org: Development of a Theory-Based HIV/STI Website for Young Black MSM. <i>AIDS Education &amp; Prevention</i> , 23(1), 1-12. doi: 10.1521/aeap.2011.23.1.1                                                                    | Not users' psychological Experience                  |
| Houston, T. K., & Ford, D. E. (2008). A tailored Internet-delivered intervention for smoking cessation designed to encourage social support and treatment seeking: usability testing and user tracing. <i>Informatics for Health &amp; Social Care</i> , 33(1), 5-19.                                                                                 | Not users' psychological Experience                  |
| Jelin, E., Granum, V., & Eide, H. (2012). Experiences of a Web-Based Nursing Intervention—Interviews with Women with Chronic Musculoskeletal Pain. <i>Pain Management Nursing</i> , 13(1), 2-10. doi: 10.1016/j.pmn.2011.08.008                                                                                                                       | Intervention type                                    |
| Kelders, S. M., van Gemert-Pijnen, J. E., Werkman, A., & Seydel, E. R. (2010). Evaluation of a web-based lifestyle coach designed to maintain a healthy bodyweight. <i>Journal of Telemedicine &amp; Telecare</i> , 16(1), 3-7. doi: 10.1258/jtt.2009.001003                                                                                          | Health issue                                         |
| Kelders, S. M., Pots, W. T., Oskam, M. J., Bohlmeijer, E. T., & van Gemert-Pijnen, J. E. (2013). Development of a web-based intervention for the indicated prevention of depression. <i>BMC Medical Informatics And Decision Making</i> , 13, 26-26. doi: 10.1186/1472-6947-13-26                                                                     | Usability focus only                                 |
| Kerr, C., Murray, E., Burns, J., Turner, I., Westwood, M.A., Macadam, C., Nazareth, I., & Patterson, D. (2008). Applying user-generated quality criteria to develop an Internet intervention for patients with heart disease. <i>Journal of telemedicine and telecare</i> , 14(3):124-7. doi: 10.1258/jtt.2008.003006.                                | Health issue                                         |
| Latalova, K., Prasko, J., Kamaradova, D., Jelenova, D., Ociskova, M., & Sedlackova, Z. (2014). Internet Psychoeducation for Bipolar Affective Disorder: Basis for Preparation and First Experiences. <i>Psychiatric Quarterly</i> , 85(2), 241-255. doi: 10.1007/s11126-013-9286-y                                                                    | Intervention type                                    |

| Reference                                                                                                                                                                                                                                                                                                                                  | Reason to exclude                                    |
|--------------------------------------------------------------------------------------------------------------------------------------------------------------------------------------------------------------------------------------------------------------------------------------------------------------------------------------------|------------------------------------------------------|
| Luger, T. M., Houston, T. K., & Suls, J. (2014). Older adult experience of online diagnosis: results from a scenario-based think-aloud protocol. <i>Journal of Medical Internet Research</i> , 16(1), e16-e16. doi: 10.2196/jmir.2924                                                                                                      | Intervention type                                    |
| Lyles, C. R., Harris, L. T., Le, T., Flowers, J., Tufano, J., Britt, D., . . . Ralston, J. D. (2011). Qualitative evaluation of a mobile phone and web-based collaborative care intervention for patients with type 2 diabetes. <i>Diabetes Technology &amp; Therapeutics</i> , 13(5), 563-569. doi: 10.1089/dia.2010.0200                 | Health issue                                         |
| Maierle, D., & Ryan, P. (2011). Evaluation of satisfaction and use of electronic intervention for behavior change. <i>CIN: Computers, Informatics, Nursing</i> , 29(11), 622-629. doi: 10.1097/ncn.0b013e318224b4b2                                                                                                                        | Not users' psychological Experience                  |
| Markham, C. M., Shegog, R., Leonard, A., Bui, T. C., & Paul, M. E. (2009). +CLICK: harnessing web-based training to reduce secondary transmission among HIV-positive youth. <i>AIDS Care</i> , 21(5), 622-631. doi: 10.1080/09540120802385637                                                                                              | Not users' psychological Experience                  |
| Marziali, E., & Garcia, L. J. (2011). Dementia caregivers' responses to 2 internet-based intervention programs. <i>American Journal of Alzheimer's Disease &amp; Other Dementias</i> , 26(1), 36-43. doi: 10.1177/15333175110387586                                                                                                        | Intervention type                                    |
| McTigue, K. M., Bhargava, T., Bryce, C. L., Conroy, M., Fischer, G. S., Hess, R., . . . Zickmund, S. (2011). Patient perspectives on the integration of an intensive online behavioral weight loss intervention into primary care. <i>Patient Education &amp; Counseling</i> , 83(2), 261-264. doi: 10.1016/j.pec.2010.05.009              | Health issue                                         |
| Meglic, M., Furlan, M., Kuzmanic, M., Kozel, D., Baraga, D., Kuhar, I., . . . Brodnik, A. (2010). Feasibility of an eHealth service to support collaborative depression care: results of a pilot study. <i>Journal of Medical Internet Research</i> , 12(5), e63-e63. doi: 10.2196/jmir.1510                                               | Not users' psychological Experience                  |
| Ossebaard, H. C., Seydel, E. R., & van Gemert-Pijnen, L. (2012). Online usability and patients with long-term conditions: a mixed-methods approach. <i>International Journal of Medical Informatics</i> , 81(6), 374-387. doi: 10.1016/j.ijmedinf.2011.12.010                                                                              | Health issue                                         |
| Riiser, K., Løndal, K., Ommundsen, Y., Sundar, T., & Helseth, S. (2013). Development and Usability Testing of an Internet Intervention to Increase Physical Activity in Overweight Adolescents. <i>Journal of Medical Internet Research</i> , 15(1), 7-7. doi: 10.2196/resprot.2410                                                        | Not users' psychological experience and health issue |
| Ruggiero, L., Moadsiri, A., Quinn, L. T., Riley, B. B., Danielson, K. K., Monahan, C., . . . Gerber, B. S. (2014). Diabetes Island: Preliminary Impact of a Virtual World Self-Care Educational Intervention for African Americans With Type 2 Diabetes. <i>Journal of Medical Internet Research</i> , 16(8), 1-1. doi: 10.2196/games.3260 | Health issue                                         |
| Ryan, P., Pumilia, N. J., Henak, B., & Chang, T. (2009). Development and performance usability testing of a theory-based, computerized, tailored intervention. <i>CIN: Computers, Informatics, Nursing</i> , 27(5), 288-300. doi: 10.1097/NCN.0b013e3181b21779                                                                             | Not users' psychological experience and health issue |

| Reference                                                                                                                                                                                                                                                                                                                                                               | Reason to exclude                                    |
|-------------------------------------------------------------------------------------------------------------------------------------------------------------------------------------------------------------------------------------------------------------------------------------------------------------------------------------------------------------------------|------------------------------------------------------|
| Saulsberry, A., Corden, M., Taylor-Crawford, K., Crawford, T., Johnson, M., Froemel, J., . . . Van Voorhees, B. (2013). Chicago Urban Resiliency Building (CURB): An Internet-Based Depression-Prevention Intervention for Urban African-American and Latino Adolescents. <i>Journal of Child &amp; Family Studies</i> , 22(1), 150-160. doi: 10.1007/s10826-012-9627-8 | Not users' psychological Experience                  |
| Shegog, R., Markham, C. M., Leonard, A. D., Bui, T. C., & Paul, M. E. (2012). "+CLICK": pilot of a web-based training program to enhance ART adherence among HIV-positive youth. <i>AIDS Care</i> , 24(3), 310-318. doi: 10.1080/09540121.2011.608788                                                                                                                   | Health issue and not users' psychological Experience |
| Swan, A. J., & Tyssen, E. G. (2009). Enhancing treatment access: Evaluation of an Australian Web-based alcohol and drug counselling initiative. <i>Drug &amp; Alcohol Review</i> , 28(1), 48-53. doi: 10.1111/j.1465-3362.2008.00006.x                                                                                                                                  | Intervention type                                    |
| Van Voorhees, B. W., Gollan, J., & Fogel, J. (2012). Pilot study of Internet-based early intervention for combat-related mental distress. <i>Journal of Rehabilitation Research &amp; Development</i> , 49(8), 1175-1190. doi: 10.1682/jrrd.2011.05.0095                                                                                                                | Not users' psychological experience                  |
| Voncken-Brewster, V., Moser, A., van der Weijden, T., Nagykaldi, Z., de Vries, H., & Tange, H. (2013). Usability evaluation of an online, tailored self-management intervention for chronic obstructive pulmonary disease patients incorporating behavior change techniques. <i>JMIR Research Protocols</i> , 2(1), e3-e3. doi: 10.2196/resprot.2246                    | Not users' psychological experience and health issue |
| Williams, R. A., Gatien, G., & Hagerty, B. (2011). Design element alternatives for stress-management intervention websites. <i>Nursing Outlook</i> , 59(5), 286-291.e283. doi: 10.1016/j.outlook.2011.03.009                                                                                                                                                            | Not users' psychological experience                  |
| Williams, S., Yardley, L., & Wills, G. B. (2013). A qualitative case study of LifeGuide: Users' experiences of software for developing Internet-based behaviour change interventions. <i>Health Informatics Journal</i> , 19(1), 61-75. doi: 10.1177/1460458212458915                                                                                                   | Intervention type                                    |
